# Supplementary material
Source: PubMed Central journal article supplement (PMC6583882)
Supplement: jamasurg-153-791-s001.pdf [file jamasurg-153-791-s001.pdf]

1 Supplement 1: Protocol and Statistical Analysis Plan

2  
3 **a. Study design:**

- 4 a. Prospective, randomized, multi-arm, open-label trial

5  
6 **b. Location:**

- 7 a. Gillette Stadium, Foxborough, Massachusetts, USA.

8  
9 **c. Population:**

- 10 a. Trial subject population consisted of 562 Team Ops (Stadium security) and other  
11 stadium staff members.

12  
13 **d. Consent:**

- 14 a. Participation in the study was voluntary and oral consent was obtained from all  
15 subjects. A fact sheet was provided to all participants.

16  
17 **e. Inclusion/Exclusion criteria:**

- 18 a. Adult (18 years and above) volunteers with no prior hemorrhage control training  
19 or experience were included in the trial.  
20 b. Anyone with previous formal hemorrhage control or tourniquet training was  
21 excluded from the trial analysis.

22  
23 **f. Randomization:**

- 24 1. Eligible study subjects were randomized into the following arms:

- 25 **i. Control arm:** Study subjects in this arm of trial received no intervention (no  
26 training or access to point-of-care prompts) to assess baseline competence in  
27 hemorrhage control.
- 28 **ii. Experimental arm 1:** Study subjects in this arm were given the American College  
29 of Surgeons Bleeding Control Basic (B-Con) in-person training course by  
30 qualified instructors. This curriculum was developed by a collaboration between  
31 American College of Surgeons and the Hartford Consensus.<sup>2</sup> The session included  
32 a multimedia presentation in a class format that included some background  
33 information about extremity hemorrhage and potential benefits of immediate first-  
34 response and hemorrhage control, steps to take in a mass casualty scenario and  
35 instructional videos on hemorrhage control modalities and their appropriate use.  
36 This was followed by hands on training in hemorrhage control, with 1:4,  
37 instructor to trainee ratio.
- 38 **iii. Experimental arm 2:** Study subjects in this arm received a commercially  
39 available audio bleeding control kit. The kit included diagram and visual aids to  
40 identify the correct severity of injury and determine the appropriate method of  
41 bleeding control. The kit also had buttons on it to play stepwise audio instructions  
42 on application of compression dressing, hemostatic packing and tourniquet  
43 application in two languages (English and Spanish). The audio kits were bought at  
44 market price and the name of the manufacturer was not mentioned in the  
45 manuscript to avoid conflict of interest.

46 iv. **Experimental arm 3:** Study participants in this arm of the trial received bleeding  
47 control flashcards that contain diagrams and figures to correctly identify the  
48 severity of injury and visual instructions on appropriate application of pressure  
49 dressing, hemostatic packing and tourniquet.  
50

51 **g. Sample size calculation:**

52 a. Sample Size calculation was done using Stata v14.1 with 80% power and an alpha  
53 level of 0.05. Trial arm paired-comparisons were taken as independent trials and  
54 sample size was calculated for each pair. The largest number was taken as the  
55 sample size for each arm. The smallest difference in application rate, and the arm  
56 used to determine sample size calculation, was between the control and flashcard  
57 arm.

58 i. Control group expected application rate 20% based on prior studies

59 ii. Flashcard Proportion expected application rate 44% based on prior studies

60 b. Final sample size is 412 with 103 subjects in each arm. This is before exclusion of  
61 individuals with prior hemorrhage control training thus, to account for 20% of  
62 individuals to report prior training, over 125 individuals will be recruited to each  
63 arm.

64 **h. Pre-study questionnaire:**

65 a. Study subjects were given a pre-trial questionnaire to gather information  
66 regarding age, gender, level of education, any prior first-aid training, and if they  
67 reported prior first-aid training, whether it included hemorrhage control training.  
68 Those individuals who reported prior hemorrhage control training were then  
69 asked an open ended question about what that training consisted of.  
70

71 **i. Protocol:**

72 a. A reviewer will read aloud a simulated scenario describing an explosion in a  
73 public gathering. A bleeding mannequin with traumatic amputation of leg just  
74 above the knee will be present. The participant will then be directed to a nearby  
75 bleed-control box and asked to stop the bleeding. The bleed-control box will  
76 contain a combat application tourniquet (CAT). The reviewer will start timing  
77 after directing the subject to the bleed-control box.

78 Subjects in the control arm were directly subjected to the bleeding control  
79 test. Experimental arm 1 subjects will attend B-Con course taught by ACS trained  
80 instructors and then subjected to the test. Experimental arm 3 and 4 subjects  
81 received an audio guide and flash card in their bleed-control box respectively,  
82 during the test.

83 The participants were timed until they feel that they had stopped the  
84 bleeding. Time for complete bleeding control and tourniquet application was  
85 recorded only for subject who appropriately control the hemorrhage within 7  
86 minutes. Appropriateness of hemorrhage control was determined by correct  
87 placements of tourniquet and adequate pressure of the tourniquet as determined  
88 by attempting to forcefully slide a Kelly clamp under between the tourniquet and  
89 the extremity of the mannequin. For unsuccessful hemorrhage control, the reason  
90 for failure was recorded. No feedback was be given to the participant during the  
91 test.

92                   b. 20 reviewers were used for the purpose of this study. All the reviewers were  
93                   physicians, nurses, and EMTs, trained in hemorrhage-control.

94           1. After testing of the two point of care prompt arms and the control arm, these individuals  
95           then underwent the ACS B-Con training from qualified instructors. This training was 45  
96           to 60 minutes long, consisting of an audio-visual presentation with tourniquet application  
97           instructions followed by hand-on training under the supervision of an instructor, the same  
98           as the B-Con intervention arm.

99

100   **j. Test for retention:**

101           a. 3-9 months after the trial, we planned to test all study subjects with a simulated  
102           mass causality scenario for retention of knowledge and skills. This test will be the  
103           same as the initial test for competence at tourniquet placement in the trial and the  
104           same evaluation form will be used to evaluate the study subjects.

105

106   **k. Donation of study material:**

107           a. At the end of the retention study, the bleeding control boxes will be donated to the  
108           stadium, to be co-located with AEDs.

109

110   **l. Outcomes:**

111           a. The primary outcome in the study, both during the initial randomized trial and at  
112           retention testing, is the proportion of study subjects successfully achieving  
113           hemorrhage control with a CAT tourniquet. Secondary outcomes include time to  
114           hemostasis, time to appropriate tourniquet application.

115

116   **m. Statistical analysis:**

117           a. The primary outcome in our study was the correct application of tourniquets. The  
118           main analyses in the randomized study were the pairwise comparisons of the  
119           proportion of correct tourniquet application in each of the three intervention arms  
120           to the control arm. In the IRB, we had planned to use a chi-square test to compare  
121           proportions, However, prior to data analysis of the randomized arms, but after  
122           submission of the IRB, the decision was made to utilize Fishers exact test in case  
123           of rare events (extremely low or high numbers of events), which would lead to  
124           better control of Type 1 error in that case.

125                   i. In the initial testing phase, the proportion of participants who correctly  
126                   applied a tourniquet in the three intervention arms were compared to  
127                   control using three pairwise two-sided Fisher's Exact Test of the three  
128                   interventions to control in an intent-to-treat analysis (as randomized).

129                   ii. To analyze retention, we performed two pairwise comparisons: 1) all  
130                   participants tested at retention versus initial control to identify long-term  
131                   efficacy (correct tourniquet application) compared to no training; 2)  
132                   participants tested at retention versus initial testing in B-Con randomized  
133                   arm to identify if there is a significant skill decay 3-9 months after  
134                   training. Generalized estimating equations z-tests were used in these  
135                   pairwise tests to account for the repeated measures on participants who  
136                   were in both the initial and retention phases.

- 137 b. At retention testing, an a priori planned logistic regression analysis was performed  
 138 to identify any demographic associations with correct tourniquet application  
 139 between 3 and 9 months after B-Con training. It also assessed for different effects  
 140 due to the original (randomized) arm in initial testing in case the combination of  
 141 randomized arm and then B-con training had differential effects on correct  
 142 tourniquet application (although our a priori hypothesis was that there would be  
 143 no difference). Age was divided into a categorical variables creating three groups  
 144 using previously defined age breaks: young adult [18-35 years old (yo)], middle  
 145 aged adult (35-55 yo), and older adult (> 55 yo). This model assessed for an  
 146 association between days since training to retention testing, allowing for a non-  
 147 linear effect. We assessed for co-linearity, and interactions between variables [age  
 148 and education, age and sex, age and prior training, sex and education, sex and  
 149 prior training] and ran diagnostics on the model fit. No collinearity (Supplement  
 150 Table 1) or significant interaction (Supplement Table 2) was identified between  
 151 any variables. We used Hosmer and Lemeshow's goodness-of-fit test and with a  
 152 p-value of 0.48, indicating that our model fits the data well.
- 153 c. The Wilcoxon rank sum test was used to compare time to correct tourniquet  
 154 application across arms (restricted to participants in each arm who correctly  
 155 applied the tourniquet). Demographic variables for each intervention arm versus  
 156 control and retention versus control were compared using Wilcoxon rank sum  
 157 tests for continuous variables and two-sided Fisher Exact tests for categorical  
 158 variables.
- 159 d.

**Supplement Table 1**

| <b>Variable</b>          | <b>Variance Inflation Factor</b> |
|--------------------------|----------------------------------|
| Age                      | 1.04                             |
| Education                | 1.02                             |
| Sex                      | 1.01                             |
| Prior First Aid Training | 1.03                             |

160

**Supplement Table 2**

| <b>Interaction Terms</b> | <b>OR (C.I.)</b> | <b>p value</b> |
|--------------------------|------------------|----------------|
| Female-Age               | 1.01 (0.99-1.02) | 0.39           |
| Male-Age                 | 1.00 (0.99-1.01) | 0.77           |
| Prior Training-Age       | 1.00 (0.99-1.01) | 0.48           |

|                         |                  |      |
|-------------------------|------------------|------|
| No Prior Training-Age   | 1.00 (0.99-1.02) | 0.73 |
| Male-Prior Training     | 0.94 (0.44-1.01) | 0.06 |
| Male-No Prior Training  | 0.63 (0.36-1.08) | 0.10 |
| Female-Prior Training   | 0.85 (0.47-1.53) | 0.59 |
| Age-High School         | 1.00 (0.99-1.02) | 0.23 |
| Age-Some College        | 1.00 (0.98-1.01) | 0.34 |
| Age-Bachelors Degree    | 1.00 (0.99-1.02) | 0.81 |
| Age-Advanced Degree     | 1.00 (0.98-1.02) | 0.14 |
| Female-Some College     | 0.60 (0.26-1.38) | 0.22 |
| Female-Bachelors Degree | 1.3 (0.55-3.12)  | 0.54 |
| Female-Advanced Degree  | 0.67 (0.19-2.43) | 0.55 |
| Male-High School        | 0.73 (0.31-1.68) | 0.46 |
| Male-Some College       | 0.69 (0.31-1.53) | 0.36 |
| Male-Bachelors Degree   | 0.72 (0.31-1.67) | 0.44 |
| Male-Advanced Degree    | 0.54 (0.17-1.75) | 0.31 |
